# Supplementary material for: The Association between Polymorphisms of Vitamin D Metabolic-Related Genes and Vitamin D3 Supplementation in Type 2 Diabetic Patients
Source: Hindawi journal article supplement (doi:10.1155/2019/8289741), 2019-09-08
Supplement: f1 [file 8289741.f1.pdf]

Table S1. Description of Candidate SNPs Genotyped

| LD <sup>a</sup> | SNP <sup>b</sup> | Gene                                                    | SNP location or coding change | Alleles | N <sup>c</sup> | MAF  |
|-----------------|------------------|---------------------------------------------------------|-------------------------------|---------|----------------|------|
|                 | rs10766197       | CPY2R1                                                  | 5'                            | G/A     | 112            | 0.46 |
|                 | rs 10741657      | (25-hydroxylase)                                        | 5'                            | G/A     | 112            | 0.40 |
| *               | rs10877012       | CYP27B1                                                 | 5'                            | G/T     | 112            | 0.33 |
| *               | rs 4646536       | (1- hydroxylase)                                        | intron                        | T/C     | 112            | 0.33 |
|                 | rs 6013897       | CYP24A1<br>(24- hydroxylase)                            | 3'                            | T/ A    | 112            | 0.20 |
|                 | rs12785878       | DHCR7<br>(7-dehydro-cholesterol reductase) <sup>d</sup> | 5'                            | T/ G    | 112            | 0.26 |
|                 | rs2228570        | VDR                                                     | Start codon <sup>e</sup>      | C/T     | 112            | 0.37 |
|                 | rs1544410        | (Vitamin D receptor)                                    | intron                        | G/A     | 112            | 0.39 |

Abbreviations: LD, linkage disequilibrium; SNP, single nucleotide polymorphism; MAF, minor allele frequency.

<sup>a</sup> Within each gene, \* (or ^) indicates SNPs in high LD with each other ( $r^2 > 95\%$ ).

<sup>b</sup> VDR restriction fragment length polymorphisms: rs2228570 (fok1), rs1544410 (bsm1).

<sup>c</sup> Number of participants with genotype data available for analysis.

<sup>d</sup> DHCR7 SNPs (rs12785878) are located within introns in the upstream NADSYN1 gene.

<sup>e</sup> SNP rs2228570 (fok1) leads to new start site 9 bp upstream and VDR protein longer by 3 amino acids.

**Table S2. Baseline 25(OH)D levels in patients with different SNP genotypes**

| Gen     | SNP        | Gene locus | 25(OH)D $\geq$ 30ng/mL, n (%) | 25(OH)D<30ng/mL, n (%) | RR (95% CI) <sup>a</sup> | <i>P</i> <sup>b</sup> | RR (95% CI) <sup>c</sup> | <i>P</i> <sup>d</sup> |
|---------|------------|------------|-------------------------------|------------------------|--------------------------|-----------------------|--------------------------|-----------------------|
| CPY2R1  | rs10766197 | G/G        | 8(16)                         | 42(84)                 | 1                        | 0.363                 | 1                        | 0.116                 |
|         |            | A/A        | 5(31.25)                      | 11(68.75)              | 0.82 (0.52,1.09)         |                       | 0.74 (0.60,0.99)         |                       |
|         |            | A/G        | 7(15.22)                      | 39(84.78)              | 1.01 (0.84,1.21)         |                       | 0.96(0.95,1.17)          |                       |
|         | rs10741657 | G/G        | 8(17.78)                      | 37(82.22)              | 1                        | 0.246                 | 1                        | 0.388                 |
|         |            | A/A        | 5(33.33)                      | 10(66.67)              | 0.81 (0.49,1.11)         |                       | 0.83 (0.51,1.14)         |                       |
|         |            | A/G        | 7(13.46)                      | 45(86.54)              | 1.05 (0.88,1.27)         |                       | 1.04(0.87,1.27)          |                       |
| CPY27B1 | rs10877012 | T/T        | 9(16.67)                      | 45(83.33)              | 1                        | 0.865                 | 1                        | 0.803                 |
|         |            | G/G        | 3(15.79)                      | 16(84.21)              | 1.01 (0.76,1.24)         |                       | 1.09(0.80,1.10)          |                       |
|         |            | G/T        | 8(20.51)                      | 31(79.49)              | 0.95(0.76,1.16)          |                       | 1.04 (0.80,1.06)         |                       |
|         | rs4646536  | T/T        | 3(15.79)                      | 16(84.21)              | 1                        | 0.865                 | 1                        | 0.803                 |
|         |            | C/C        | 9(16.67)                      | 45(83.33)              | 0.99(0.81,1.33)          |                       | 0.92 (0.91,1.25)         |                       |
|         |            | C/T        | 8(20.51)                      | 31(79.49)              | 0.94(0.74,1.28)          |                       | 0.95(0.93,1.28)          |                       |
| CPY24A1 | rs6013897  | T/T        | 15(20.00)                     | 60(80.00)              | 1                        | 0.008                 | 1                        | 0.006                 |
|         |            | A/A        | 2(100.00)                     | 0(0.00)                | -                        |                       | 0.03 (0.01,0.08)         |                       |
|         |            | A/T        | 3(8.57)                       | 32(91.43)              | 1.14(0.98,1.33)          |                       | 1.14 (0.98,1.19)         |                       |

| Gen   | SNP        | Gene locus | 25(OH)D $\geq$ 30ng/mL, n (%) | 25(OH)D<30ng/mL, n (%) | RR (95% CI) <sup>a</sup> | <i>P</i> <sup>b</sup> | RR (95% CI) <sup>c</sup> | <i>P</i> <sup>d</sup> |
|-------|------------|------------|-------------------------------|------------------------|--------------------------|-----------------------|--------------------------|-----------------------|
| DHCR7 | rs12785878 | T/T        | 6(20.00)                      | 24(80.00)              | 1                        | 0.516                 | 1                        | 0.265                 |
|       |            | G/G        | 4(11.76)                      | 30(88.24)              | 1.10 (0.89,1.42)         |                       | 1.11(0.95,1.14)          |                       |
|       |            | G/T        | 10(20.83)                     | 38(79.17)              | 0.99(0.79,1.28)          |                       | 0.96(0.92,1.22)          |                       |
| VDR   | rs2228570  | T/T        | 4(15.38)                      | 22(84.62)              | 1                        | 0.871                 | 1                        | 0.972                 |
|       |            | C/T        | 13(19.40)                     | 54(80.60)              | 0.95 (0.79, 1.21)        |                       | 0.99(0.81, 1.27)         |                       |
|       |            | C/C        | 3(15.79)                      | 16(84.21)              | 0.99 (0.74, 1.29)        |                       | 1.02 (0.75, 1.23)        |                       |
|       | rs1544410  | G/G        | 20(19.05)                     | 85(80.95)              | 1                        | 0.113                 | 1                        | 0.255                 |
|       |            | A/G        | 0(0.00)                       | 7(100.00)              | -                        | -                     | -                        |                       |

**Note:** RR of 25(OH)D <30ng/mL, a: uncorrected RR, c: corrects age and amount of outdoor activity. *P* value is 25(OH)D <30ng/mL vs  $\geq$ 30 ng/mL comparison in all SNP genotypes, b: uncorrected RR, d: corrects age and amount of outdoor activity.

Table S3. 25(OH)D level and insufficiency risk in patients with different CYP27B1(10877012)genotypes after stratification of vitamin D

|                     |          | metabolism related indicators     |                             |                         |                       |                         |                       |
|---------------------|----------|-----------------------------------|-----------------------------|-------------------------|-----------------------|-------------------------|-----------------------|
| index               | genotype | 25(OH)D $\geq$ 30<br>ng/mL, n (%) | 25(OH)D <30<br>ng/mL, n (%) | RR (95%CI) <sup>a</sup> | <i>P</i> <sup>b</sup> | RR (95%CI) <sup>c</sup> | <i>P</i> <sup>d</sup> |
| Sex (female, male)  |          |                                   |                             |                         |                       |                         |                       |
| female              | T/T      | 15(35.71)                         | 23(58.97)                   | 1                       | 0.009                 | 1                       | 0.016                 |
|                     | G/G      | 6(14.29)                          | 9(23.08)                    | 0.99(0.56,1.55)         |                       | 1.01(0.55,1.63)         |                       |
|                     | G/T      | 21(50.00)                         | 7(17.95)                    | 0.41(0.19,0.77)         |                       | 0.42 (0.19, 0.82)       |                       |
| male                | T/T      | 11(55.00)                         | 5(45.45)                    | 1                       | 0.785                 | 1                       | 0.590                 |
|                     | G/G      | 2(10.00)                          | 2(18.18)                    | 1.60(0.310,5.04)        |                       | 2.35 (0.38, 9.41)       |                       |
|                     | G/T      | 7(35.00)                          | 4(36.36)                    | 1.16(0.36,3.52)         |                       | 1.49 (0.39, 4.58)       |                       |
| BMI( $\geq$ 24,<24) |          |                                   |                             |                         |                       |                         |                       |
| $\geq$ 24           | T/T      | 9(30.00)                          | 20(57.14)                   | 1                       | 0.031                 | 1                       | 0.025                 |
|                     | G/G      | 5(16.67)                          | 7(20.00)                    | 0.85 (0.43, 1.36)       |                       | 0.79 (0.44, 1.31)       |                       |
|                     | G/T      | 16(53.33)                         | 8(22.86)                    | 0.48(0.24,0.84)         |                       | 0.45 (0.31, 0.81)       |                       |
| <24                 | T/T      | 17(53.13)                         | 8(53.33)                    | 1                       | 0.229                 | 1                       | 0.229                 |
|                     | G/G      | 3(9.38)                           | 4(26.67)                    | 1.79 (0.64,4.15)        |                       | 1.85 (0.63,3.65)        |                       |
|                     | G/T      | 12(37.50)                         | 3(20.00)                    | 0.63 (0.15,1.80)        |                       | 0.65 (0.15,2.08)        |                       |

---

| TC( $\geq 5.20$ mmol/L, $< 5.20$ mmol/L) |                   |     |           |           |                   |       |                   |       |
|------------------------------------------|-------------------|-----|-----------|-----------|-------------------|-------|-------------------|-------|
|                                          | $\geq 5.2$ mmol/L | T/T | 9(31.03)  | 11(57.89) | 1                 | 0.002 | 1                 | 0.013 |
|                                          |                   | G/G | 3(10.34)  | 6(31.58)  | 1.21 (0.58, 2.22) |       | 1.52 (0.74, 3.86) |       |
|                                          |                   | G/T | 17(58.62) | 2(10.53)  | 0.19(0.03,0.59)   |       | 0.38 (0.09, 0.49) |       |
|                                          | $< 5.2$ mmol/L    | T/T | 17(51.52) | 17(54.84) | 1                 | 0.933 | 1                 | 0.921 |
|                                          |                   | G/G | 5(15.15)  | 5(16.13)  | 1.00(0.42, 1.85)  |       | 0.98 (0.41, 1.81) |       |
|                                          |                   | G/T | 11(33.33) | 9(29.03)  | 0.90(0.46, 1.58)  |       | 0.89(0.46, 1.55)  |       |

---

**Note:** RR of 25(OH)D  $< 30$  ng/mL, a: uncorrected RR, c: corrects age and amount of outdoor activity. *P* value is 25(OH)D  $< 30$  ng/mL vs  $\geq 30$  ng/mL comparison in all SNP types, b: uncorrected RR, d: corrects age and amount of outdoor activity.
